# Supplementary material
Source: Springer Nature journal article supplement (https://www.springermedizin.de/resource/supplementary/13054_2010_8822_MOESM6_ESM.pdf/9732650)
Supplement: MOESM6 [file 9732650]

**DeltaCO<sub>2</sub> (l/min)**

**DeltaGEDV<sub>2</sub> (ml)**

**DeltaEVLW<sub>2</sub> (ml)**

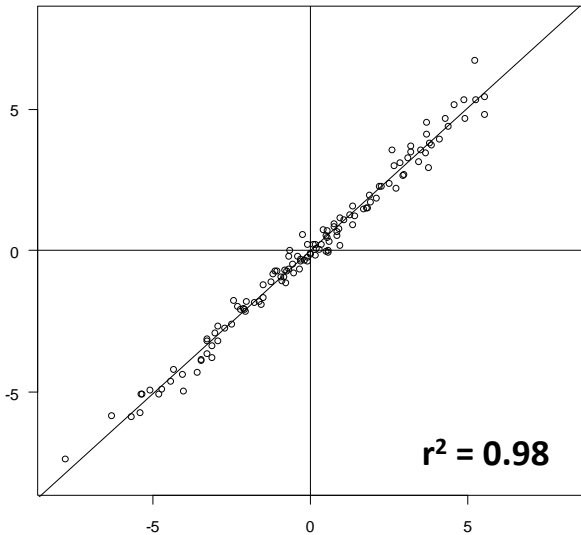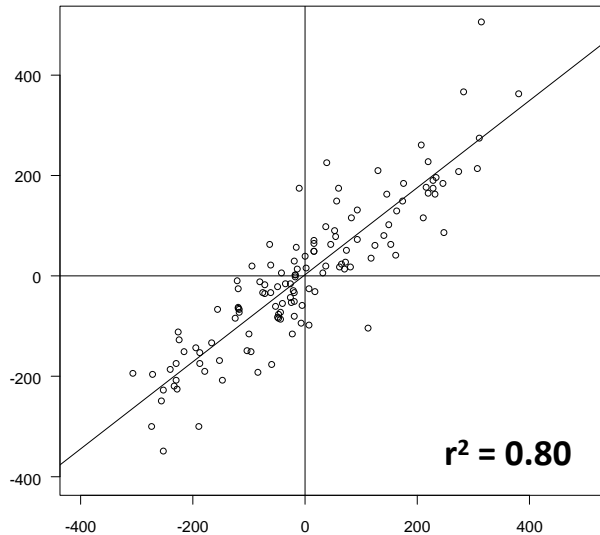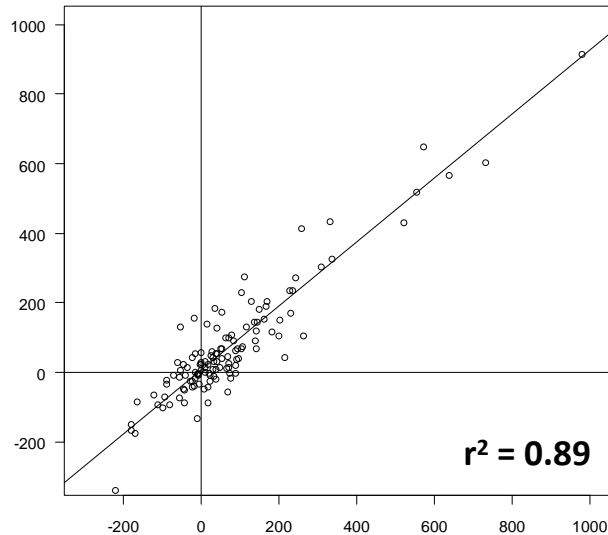

**DeltaCO<sub>1</sub> (l/min)**

**DeltaGEDV<sub>1</sub> (ml)**

**DeltaEVLW<sub>1</sub> (ml)**

**$r^2 = 0.98$**

**$r^2 = 0.80$**

**$r^2 = 0.89$**
